# Supplementary material for: Coupling homogeneous and heterogeneous catalysis for enhancement of HCOOH electrooxidation via the dehydrogenation pathway
Source: Royal Society of Chemistry journal article supplement (doi:10.1039/d2cc05955j), 2023-01-01
Supplement: d2cc05955j1.pdf [file d2cc05955j1.pdf]

## Coupling homogeneous and heterogeneous catalysis for enhancement of HCOOH electrooxidation via the dehydrogenation pathway

Yan Li, Rui Li, Bin Hong Liu and Zhou Peng Li

### IR-compensation of cyclic voltammetry performance.

Through electrochemical impedance spectrum measurement as shown in Fig. S1A, we find that the electrolyte resistance ( $R_u$ ) slightly increases with increasing the  $VOSO_4$  content in the electrolyte, as tabulated in Tab. S1. Regarding the measured electrolyte resistance, the compensation voltage ( $V_{comp}$ ) is determined by following formula:

$$V_{comp} = V_{measured} - I_{cell} \times R_u$$

IR-compensation of the cyclic voltammetry performance is conducted on the basis of above formula and CV data (Fig. S1B). Here,  $V_{measured}$  and  $I_{cell}$  refer the measured values of voltage and current during CV measurement, respectively.

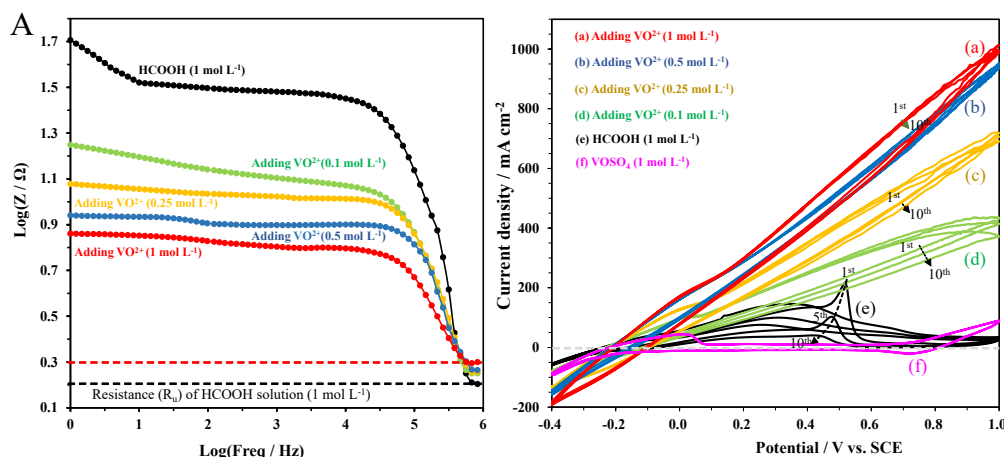

**Fig. S1** (A) Bode plots of Pd/C electrode in  $HClO_4$ -based electrolytes ( $1.0 \text{ mol L}^{-1}$  of  $HClO_4$ ) containing HCOOH ( $1.0 \text{ mol L}^{-1}$ ) or/and  $VOSO_4$  with different concentrations. (B) Cyclic voltammetry performance of Pd/C electrode without IR-compensation at a stirring rate of 400 rpm, scan rate of  $50 \text{ mV s}^{-1}$ , and temperature of  $30 \text{ }^\circ\text{C}$ .

**Tab. S1** Electrolyte resistance of  $HClO_4$ -based electrolytes ( $1 \text{ mol L}^{-1}$  of  $HClO_4$ ) containing HCOOH ( $1 \text{ mol L}^{-1}$  of HCOOH) and  $VOSO_4$  with different concentrations

| Electrolyte                              | HCOOH<br>( $1 \text{ mol L}^{-1}$ ) | $VO^{2+}$ -added electrolyte ( $\text{mol L}^{-1}$ of $VOSO_4$ ) |      |      |      |
|------------------------------------------|-------------------------------------|------------------------------------------------------------------|------|------|------|
|                                          |                                     | 0.1                                                              | 0.25 | 0.5  | 1.0  |
| Solution resistance ( $R_u$ ) / $\Omega$ | 1.60                                | 1.78                                                             | 1.81 | 1.84 | 1.97 |

### Composition of produced gas through identification of gas chromatography.

A gas chromatograph (Agilent Technologies 7820A) equipped with a thermal conductivity detector (TCD) and a TDX-01 column is operated as follows: injector  $250 \text{ }^\circ\text{C}$ , detector  $300 \text{ }^\circ\text{C}$ , oven initial temperature  $60 \text{ }^\circ\text{C}$  for 2 min, then increasing at  $25 \text{ }^\circ\text{C min}^{-1}$  to  $260 \text{ }^\circ\text{C}$ . Ar is the carrier gas flowing at  $20 \text{ mL min}^{-1}$ . The  $CO_2$  reference gas is prepared by reaction of  $CaCO_3$  with  $H_2SO_4$  solution, showing a single component at retention time of 6.78 min. The created gas from HCOOH decomposition in HCOOH analyte for 1.8 h under catalysis of Pd/C via non-Faradaic dehydrogenation, shows two components at retention times of 0.40 and 6.78 min (Fig. S2), assigned to  $H_2$  and  $CO_2$  peaks with a molar ratio of  $H_2$  to  $CO_2 \approx 1:1$  (Tab. S2). The  $CO_2$  content is significantly increased in the produced gas after HCOOH electrooxidation at a current density of  $60 \text{ mA cm}^{-2}$  for 1.9 h under the  $VO^{2+}/Pd$  combination, reaching the mole ratio of  $H_2$  to  $CO_2 = 1:18.72$ .

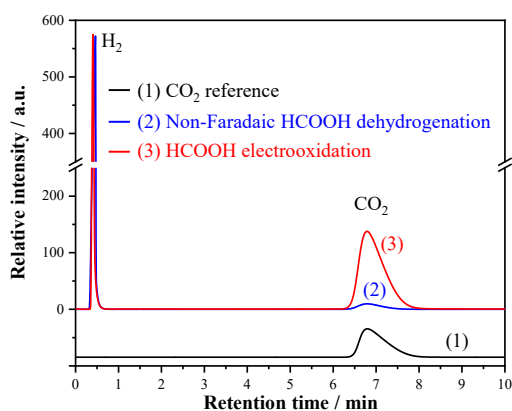

**Fig. S2** Chromatogram (TCD) of gases from: (1) reaction of  $\text{CaCO}_3$  with  $\text{H}_2\text{SO}_4$ , (2) Non-Faradaic HCOOH dehydrogenation in  $\text{HClO}_4$ -based HCOOH analytes containing  $1.0 \text{ mol L}^{-1}$  of  $\text{HClO}_4$  and HCOOH, (3) HCOOH electrooxidation at Pd/C anode in  $\text{VOSO}_4$ -added analytes on the basis of HCOOH anolyte (containing  $1.0 \text{ mol L}^{-1}$  of  $\text{HClO}_4$  and HCOOH, and  $0.5 \text{ mol L}^{-1}$  of  $\text{VOSO}_4$ ).

**Tab. S2** Composition of the produced gas after HCOOH electrooxidation and non-Faradaic dehydrogenation identified by gas chromatography

| Sample                             | $\text{CO}_2$ content / ppm | $\text{H}_2$ content / ppm | $\text{CO}_2$ proportion / % | $\text{H}_2$ proportion / % |
|------------------------------------|-----------------------------|----------------------------|------------------------------|-----------------------------|
| Non-Faradaic HCOOH dehydrogenation | $3.38 \times 10^5$          | $2.97 \times 10^5$         | 53.25                        | 46.75                       |
| HCOOH electrooxidation             | $5.79 \times 10^5$          | $3.09 \times 10^4$         | 94.93                        | 5.07                        |
| $\text{CO}_2$ reference            | $4.12 \times 10^5$          | -                          | 100                          | -                           |

### Colour variation of analytes during operation.

The colour variation of analytes during cell operation is illustrated in Fig. S3, using  $\text{VOSO}_4$  and  $\text{VOSO}_4^-$ -added HCOOH analytes. The blue  $\text{VO}^{2+}$  anolyte (100 mL,  $1 \text{ mol L}^{-1}$  of  $\text{HClO}_4$ ,  $0.5 \text{ mol L}^{-1}$  of  $\text{VOSO}_4$ ) turns to yellow, forming  $\text{VO}_2^+$ -contained anolyte when discharge to cut-off voltage of 1.0 V. The colour of the as-prepared  $\text{VOSO}_4$ -added anolyte (100 mL,  $1 \text{ mol L}^{-1}$  of  $\text{HClO}_4$  and HCOOH,  $0.5 \text{ mol L}^{-1}$  of  $\text{VOSO}_4$ ) turns from blue at operation stage (i) to green at operation stage (ii), indicating the formation of hydrated- $\text{V}^{3+}$ . Then, the anolyte colour changes to blue again at operation stage (v), and finally to yellow at operation stage (vii).

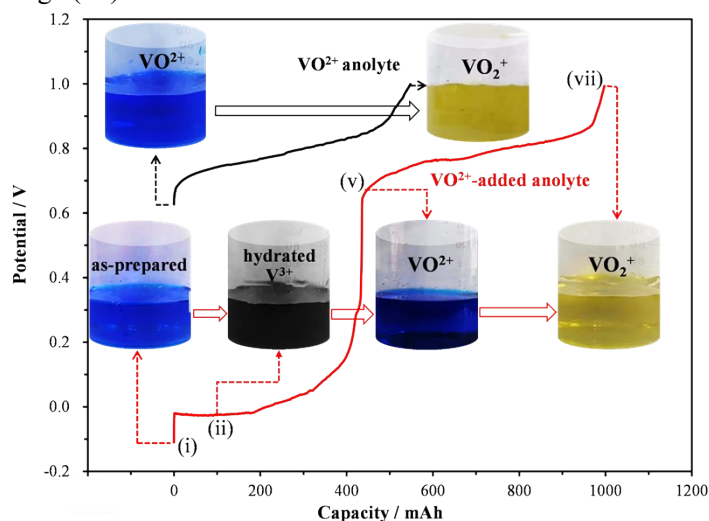

**Fig. S3** Colour variation of the  $\text{VOSO}_4$ -added anolyte during electrooxidation.

**Tab. S3** Comparison of HCOOH oxidation under catalysis of Pd with and without VO<sup>2+</sup>

| FAOR under catalysis of Pd                                                                                                                                          |                                                                                                                                                                                                                                                                            | FAOR under coupling catalysis of VO <sup>2+</sup> /Pd                                                                                                                                                                                                                                                         |
|---------------------------------------------------------------------------------------------------------------------------------------------------------------------|----------------------------------------------------------------------------------------------------------------------------------------------------------------------------------------------------------------------------------------------------------------------------|---------------------------------------------------------------------------------------------------------------------------------------------------------------------------------------------------------------------------------------------------------------------------------------------------------------|
| Pd + HCOOH → Pd-HCOOH                                                                                                                                               |                                                                                                                                                                                                                                                                            |                                                                                                                                                                                                                                                                                                               |
| Dehydrogenation pathway <sup>S1-S4</sup>                                                                                                                            | Dehydration pathway <sup>S2,S5,S6</sup>                                                                                                                                                                                                                                    | Stepwise reaction pathway                                                                                                                                                                                                                                                                                     |
| Pd-HCOOH → Pd-HCOO + H <sup>+</sup> + e <sup>-</sup><br>Pd-HCOO → Pd-CO <sub>2</sub> + H <sup>+</sup> + e <sup>-</sup><br>Pd-CO <sub>2</sub> → Pd + CO <sub>2</sub> | Pd-HCOOH → Pd-COOH + H <sup>+</sup> + e <sup>-</sup><br>Pd-COOH + H <sup>+</sup> + e <sup>-</sup> → Pd-CO + H <sub>2</sub> O<br>Pd + H <sub>2</sub> O → Pd-OH + H <sup>+</sup> + e <sup>-</sup><br>Pd-CO + Pd-OH → 2Pd + CO <sub>2</sub> + H <sup>+</sup> + e <sup>-</sup> | VO <sup>2+</sup> + Pd-HCOOH → VOH <sup>2+</sup> + Pd-HCOO<br>VO <sup>2+</sup> + Pd-HCOO → VOH <sup>2+</sup> + CO <sub>2</sub> + Pd<br>2VOH <sup>2+</sup> + 2H <sup>+</sup> → 2V[H <sub>2</sub> O] <sup>3+</sup><br>2V[H <sub>2</sub> O] <sup>3+</sup> → 2VO <sup>2+</sup> + 4H <sup>+</sup> + 2e <sup>-</sup> |
| totally, HCOOH → CO <sub>2</sub> + 2H <sup>+</sup> + 2e <sup>-</sup>                                                                                                | totally, HCOOH → CO <sub>2</sub> + 2H <sup>+</sup> + 2e <sup>-</sup>                                                                                                                                                                                                       | totally, HCOOH → CO <sub>2</sub> + 2H <sup>+</sup> + 2e <sup>-</sup>                                                                                                                                                                                                                                          |

V[H<sub>2</sub>O]<sup>3+</sup>: hydrated V<sup>3+</sup>

### Estimation of HCOOH consumption.

Tab. S4 illustrates the HCOOH consumption result according to ion chromatography. 100 mL of HCOOH anolyte (1 mol L<sup>-1</sup>) contains 100 mmol of HCOOH, theoretically producing an operation capacity of 5360 mAh. Ion chromatography result shows that 12.5 mmol of HCOOH is consumed but 87.5 mmol of HCOOH remains after operation of 1.9 h at a current of 240 mA. Regarding the operation capacity of 456 mAh, only 8.5 mmol of HCOOH participates the electrooxidation reaction with a coulombic efficiency of 68%, producing 8.5 mmol of CO<sub>2</sub>. The molar ratio of CO<sub>2</sub> to H<sub>2</sub> reaches 3.125:1. However, according to the gas chromatography analysis (Tab. S2), the molar ratio of CO<sub>2</sub> to H<sub>2</sub> is measured to be 18.72:1. Based on this ratio, the coulombic efficiency is estimated to be 94.66% which is much larger than that estimated from ion chromatography result. Therefore, more detailed investigations are needed to estimate the coulombic efficiency accurately.

**Tab. S4** Composition of the anolyte before and after operation of 1.9 h at a current of 240 mA.

| Sample                   | Retention time / min | Peak height / μS | Peak area / μS min | Content / ppm | HCOOH consumption |
|--------------------------|----------------------|------------------|--------------------|---------------|-------------------|
| Anolyte before operation | 6.78                 | 3.909            | 0.754              | 460.1073      | -                 |
| Anolyte after operation  | 6.78                 | 3.434            | 0.660              | 402.7256      | 12.5%             |

### References

- S1 A. Cuesta, G. Cabello, M. Osawa and C. Gutierrez, *ACS Catalysis*, 2012, **2**, 728–738.  
 S2 R. Zhang, H. Liu, B. Wang and L. Ling, *J. Phys. Chem. C*, 2012, **116**, 22266–22280.  
 S3 Y. Wang, Y. Qi and D. Zhang, *Comput. Theor. Chem.*, 2014, **1049**, 51–54.  
 S4 Y. Liu, L. Wang, G. Wang, C. Deng, B. Wu, and Y. Gao, *J. Phys. Chem. C*, 2010, **114**, 21417–21422.  
 S5 L. Sui, W. An, Y. Feng, Z. Wang, J. Zhou and S. H. Hur, *J. Power Sources*, 2020, 451, 227830.  
 S6 A. O. Elnabawy, E. A. Murray and M. Mavrikakis, *J. Phys. Chem. C*, 2022, 126, 4374–4390.
